# Supplementary material for: Solar light-assisted electrochemical CO2 reduction on a boron-doped diamond cathode
Source: Royal Society of Chemistry journal article supplement (doi:10.1039/d4se00947a), 2024-01-01
Supplement: d4se00947a1.pdf [file d4se00947a1.pdf]

Supporting Information  
for

**Solar light-assisted electrochemical CO<sub>2</sub> reduction on boron-doped diamond cathode**

Goki Iwai<sup>1</sup>, Andrea Fiorani<sup>1</sup>, Chiaki Terashima<sup>2</sup> and Yasuaki Einaga<sup>1\*</sup>

1. Department of Chemistry, Keio University, Yokohama 223-8522, Japan.
2. Research Center for Space System Innovation, Research Institute for Science and Technology, Tokyo University of Science, Yamazaki, Noda, 278-8510, Japan.

## Table of content

|                                                                                                                                       | pp. |
|---------------------------------------------------------------------------------------------------------------------------------------|-----|
| 1. Boron-doped diamond: SEM micrograph and Raman spectrum                                                                             | 3   |
| 2. $\alpha$ -Fe <sub>2</sub> O <sub>3</sub> : characterisation                                                                        | 4   |
| 3. TiO <sub>2</sub> NT: characterisation                                                                                              | 5   |
| 4. Electrochemical CO <sub>2</sub> reduction (Pt-BDD)                                                                                 | 6   |
| 5. BDD cathode and $\alpha$ -Fe <sub>2</sub> O <sub>3</sub> photoanode                                                                | 7   |
| 6. Photoelectrochemical CO <sub>2</sub> reduction ( $\alpha$ -Fe <sub>2</sub> O <sub>3</sub> -BDD)                                    | 8   |
| 7. Potential distribution (TiO <sub>2</sub> NT-BDD)                                                                                   | 10  |
| 8. Current of $\alpha$ -Fe <sub>2</sub> O <sub>3</sub> -BDD and $\alpha$ -Fe <sub>2</sub> O <sub>3</sub> photoelectrochemical systems | 11  |
| 9. Comparison with other solar light-assisted systems                                                                                 | 12  |
| 10. References                                                                                                                        | 13  |

## 1. Boron-doped diamond: SEM micrograph and Raman spectrum

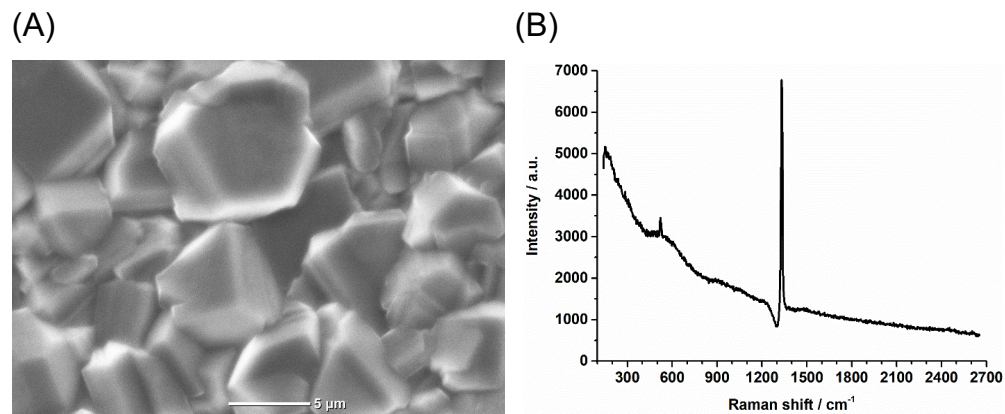

**Fig. S1** (a) SEM image of fabricated BDD showing polycrystalline structure of micrometre grain size; (b) Raman spectrum showing diamond phonon at 1332 cm<sup>-1</sup>, and two weak peaks (500 and 1200 cm<sup>-1</sup>) as result of boron doping (B/C 0.1 %). A peak around 1530 cm<sup>-1</sup> (G band) is not evident which indicates the absence of sp<sup>2</sup> carbon.

## 2. $\alpha$ -Fe<sub>2</sub>O<sub>3</sub>: characterisation

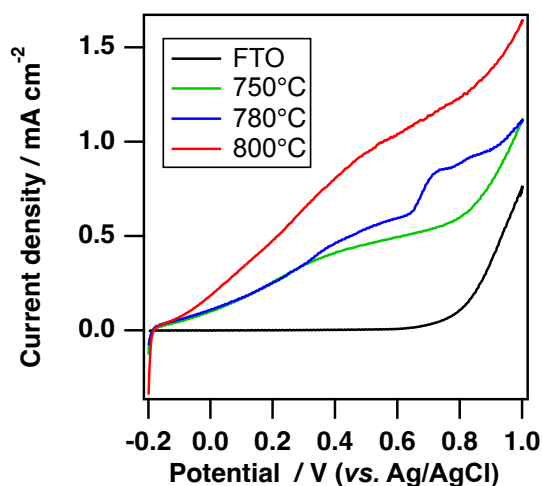

**Fig. S2** Characterisation of fabricated  $\alpha$ -Fe<sub>2</sub>O<sub>3</sub> with different heat treatment temperature. Photoelectrochemical response measured by cyclic voltammetry at 100 mV s<sup>-1</sup> in 0.5 M KOH with 1 sun light applied (AM 1.5, 100 mW cm<sup>-2</sup>). Reference electrode: Ag/AgCl/KCl (sat'd).

**Table S1** Comparison of current for  $\alpha$ -Fe<sub>2</sub>O<sub>3</sub> at 1.23 V vs. RHE under 1 Sun / AM1.5 illumination.

| Electrolyte           | Current density / mA cm <sup>-2</sup> | Ref.      |
|-----------------------|---------------------------------------|-----------|
| 1 M NaOH<br>(pH 13.6) | 1.24 mA cm <sup>-2</sup>              | 1         |
| 1 M NaOH              | 1.26 mA cm <sup>-2</sup>              | 2         |
| 1 M NaOH<br>(pH 13.6) | 0.86 mA cm <sup>-2</sup>              | 3         |
| 1 M NaOH<br>(pH 13.6) | 0.61 mA cm <sup>-2</sup>              | 4         |
| 1 M NaOH<br>(pH 13.6) | 0.43 mA cm <sup>-2</sup>              | 5         |
| 0.5 M KOH             | 0.59 mA cm <sup>-2</sup>              | This work |

### 3. TiO<sub>2</sub> NT: characterisation

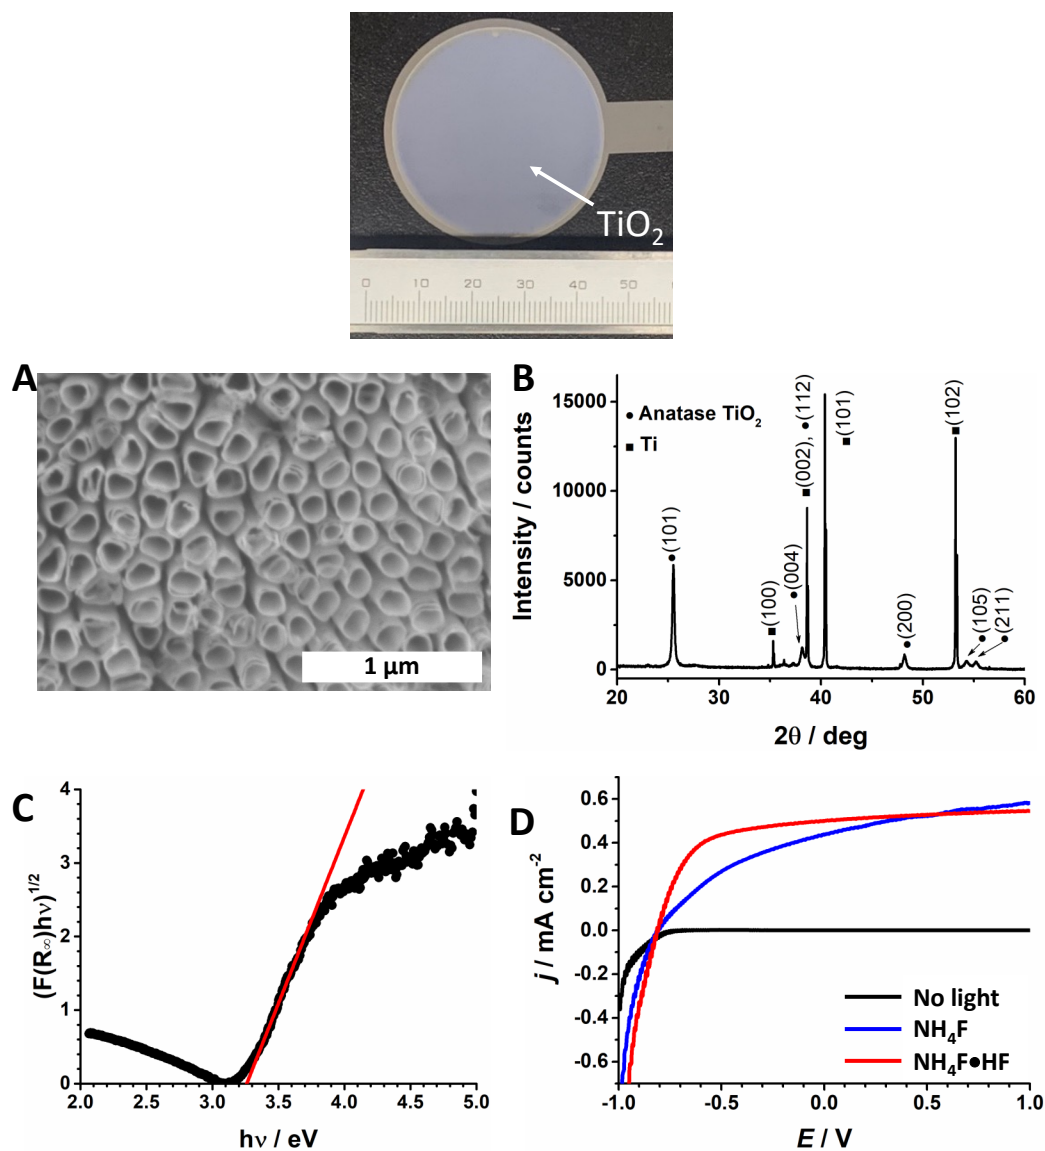

**Fig. S3** Photograph of fabricated TiO<sub>2</sub> NT electrode; Characterisation of TiO<sub>2</sub> NT. A) SEM micrograph, scale bar is 1 μm. B) XRD spectrum. C) Kubelka-Munk plot. D) Photoelectrochemical response measured by cyclic voltammetry at 100 mV s<sup>-1</sup> in 0.5 M KOH with light applied 6.5 mW cm<sup>-2</sup>. for TiO<sub>2</sub> NT fabricated with NH<sub>4</sub>F (blue) or NH<sub>4</sub>F•HF (red and black). Reference electrode: Ag/AgCl/KCl (sat'd). Reproduced from Ref. 6 with permission from the Royal Society of Chemistry.

## 4. Electrochemical CO<sub>2</sub> reduction (Pt-BDD)

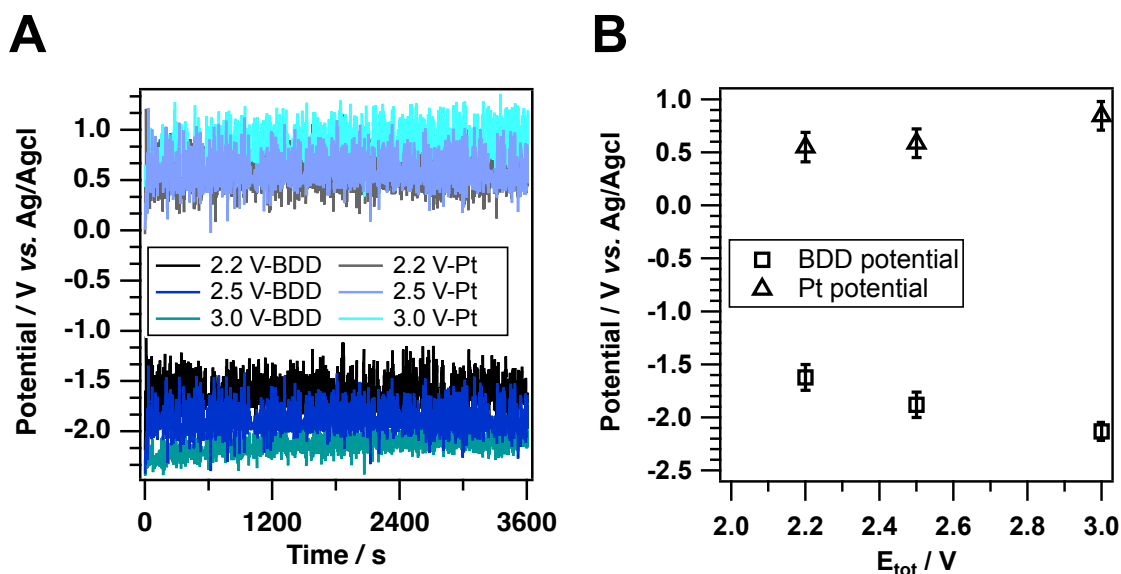

**Fig. S4** Potential for BDD and Pt electrode, respectively, during CO<sub>2</sub> reduction (without light irradiation). A) Measured potential during the total fixed voltage CO<sub>2</sub> reduction between BDD cathode and Pt anode for 60 min. B) The average value and standard deviation of the measured potential reported in Fig. A.

**Table S2** Faradaic efficiency and ECE for CO<sub>2</sub> reduction without light irradiation. Total applied voltage fixed between BDD cathode and Pt anode for 60 min.

| Applied voltage / V | FE <sub>HCOOH</sub> / % | ECE / % |
|---------------------|-------------------------|---------|
| 2.2                 | -                       | -       |
| 2.5                 | 50                      | 28      |
| 3.0                 | 75                      | 35      |

⊗ FE: Faradaic efficiency for formic acid

⊗ ECE: Electrical-to-chemical energy conversion efficiency for formic acid

**Table S3** Faradaic efficiency for CO<sub>2</sub> reduction without light irradiation.

Total applied voltage fixed between the BDD cathode vs the reference electrode for 60 min.

| Applied potential / V vs. Ag/AgCl/KCl (sat'd) | HCOOH / % |
|-----------------------------------------------|-----------|
| 2.2                                           | 66.3±4.8  |
| 2.3                                           | 72.0±3.6  |
| 2.4                                           | 74.0±0.8  |

## 5. BDD cathode and $\alpha$ -Fe<sub>2</sub>O<sub>3</sub> photoanode

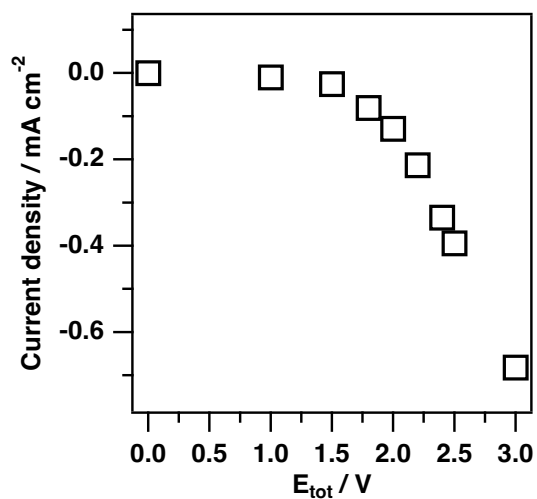

**Fig. S5** Current density during CO<sub>2</sub> reduction with BDD cathode and  $\alpha$ -Fe<sub>2</sub>O<sub>3</sub> photoanode under 1-sun illumination as function of total cell voltage, from 1 V to 3.0 V applied for 15 min.

## 6. Photoelectrochemical CO<sub>2</sub> reduction ( $\alpha$ -Fe<sub>2</sub>O<sub>3</sub>-BDD)

**Table S4** Faradaic efficiencies for all the products from photoelectrochemical CO<sub>2</sub> reduction

| $E_{\text{tot}} / \text{V}$ | HCOOH / %   | H <sub>2</sub> / % | CO / %    | Total / %   |
|-----------------------------|-------------|--------------------|-----------|-------------|
| 2.0                         | 58.9 ± 3.8  | 61.9 ± 10.0        | 2.6 ± 0.1 | 98.8 ± 2.1  |
| 2.2                         | 62.2 ± 4.4  | 34.3 ± 8.4         | 2.4 ± 0.4 | 104.4 ± 8.2 |
| 2.4                         | 58.9 ± 13.1 | 35.3 ± 14.3        | 1.6 ± 0.5 | 101 ± 5.3   |
| 2.5                         | 58.8 ± 3.8  | 39.9 ± 3.9         | 1.8 ± 0.1 | 101 ± 0.1   |

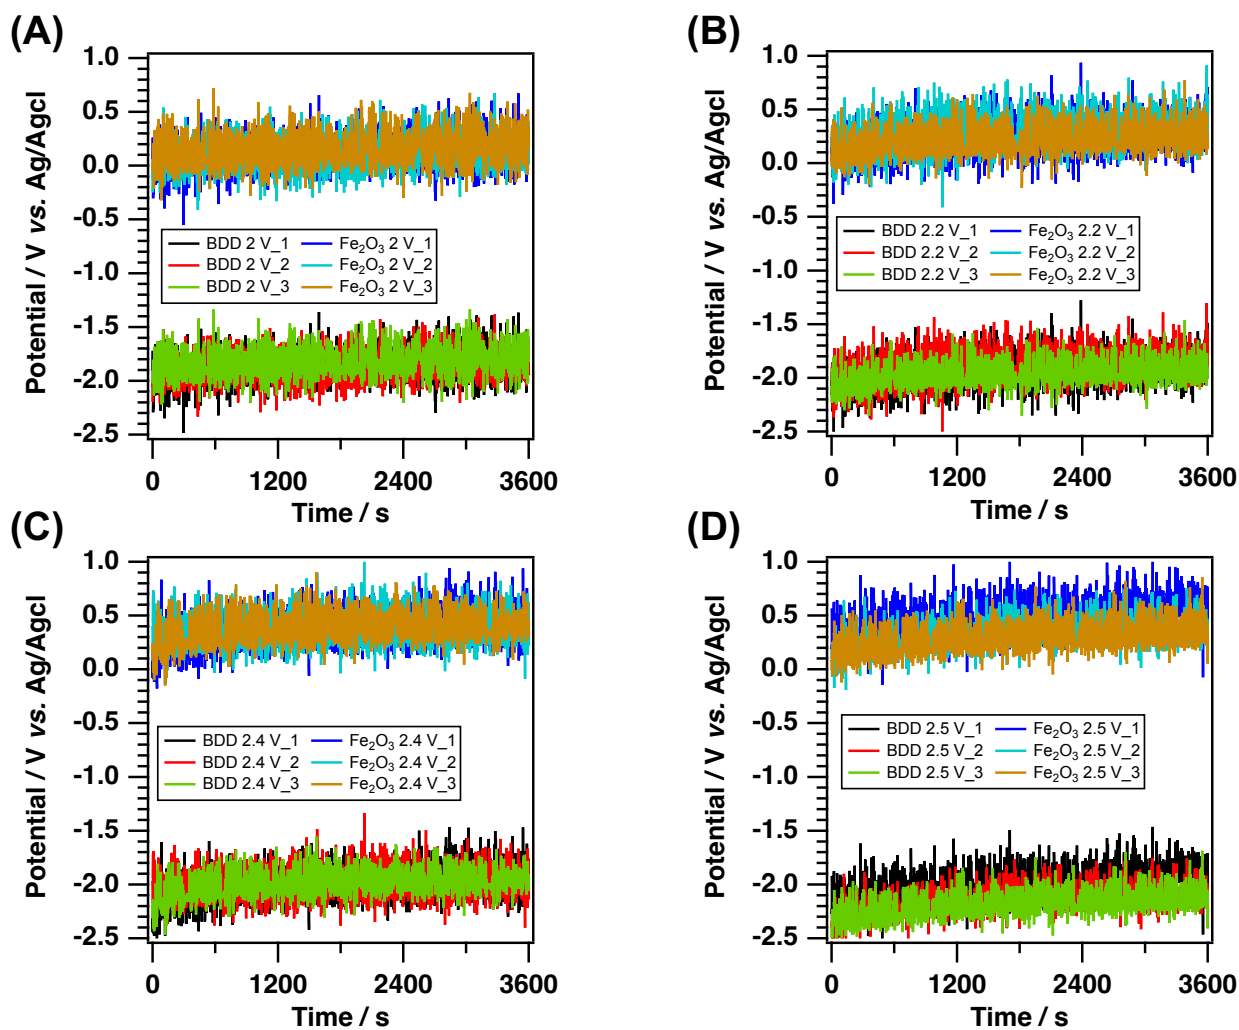

**Fig. S6** Potential monitoring: potential of BDD cathode and Fe<sub>2</sub>O<sub>3</sub> anode during the photoelectrochemical CO<sub>2</sub> reduction. (A) 2.0 V, (B) 2.2 V, (C) 2.4 V, (D) 2.5 V.



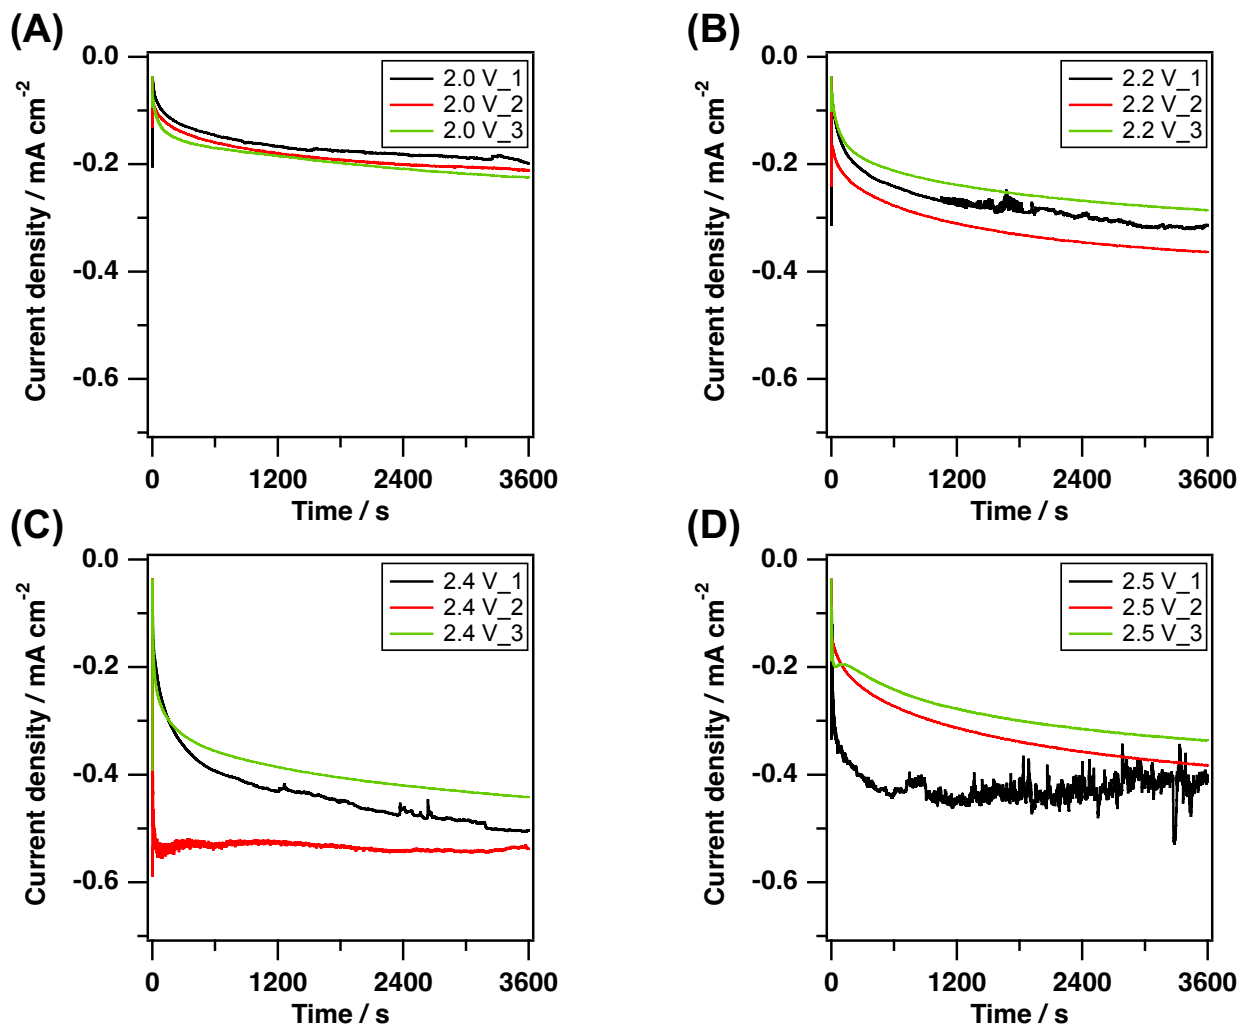

**Fig. S7** Current density during the photoelectrochemical CO<sub>2</sub> reduction. (A) 2.0 V, (B) 2.2 V, (C) 2.4 V, (D) 2.5 V

## 7. Potential distribution (TiO<sub>2</sub> NT-BDD)

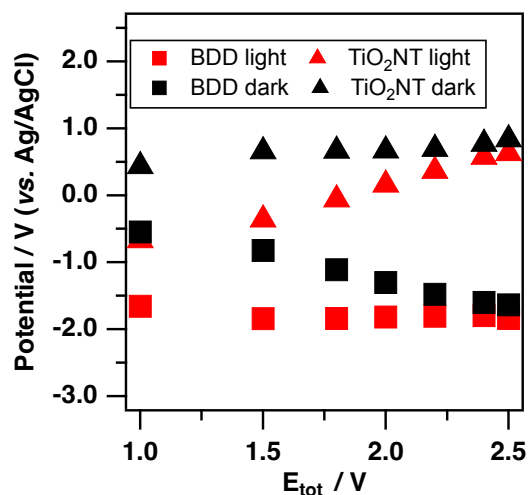

**Fig. S8** Potential distribution for TiO<sub>2</sub> NT photoanode and BDD cathode as function of applied total potential. CO<sub>2</sub> reduction for 15 min, with 1-sun irradiation (red), and dark (black).

## 8. Current of $\alpha$ -Fe<sub>2</sub>O<sub>3</sub>-BDD and $\alpha$ -Fe<sub>2</sub>O<sub>3</sub> photoelectrochemical systems

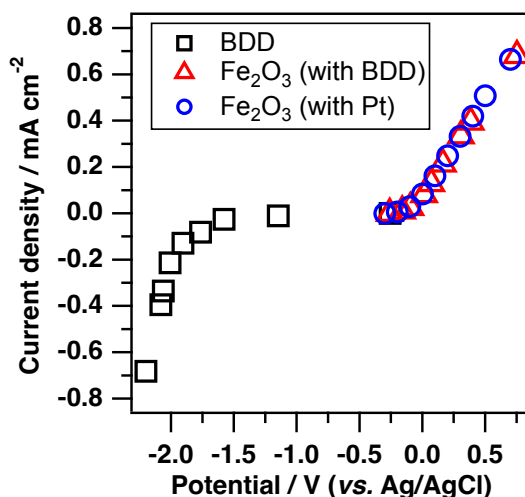

**Fig. S9** Current density as function of potential measured at BDD cathode (black square) and  $\alpha$ -Fe<sub>2</sub>O<sub>3</sub> photoanode (red triangle) during CO<sub>2</sub> reduction under 1 sun illumination applying total fixed potential between BDD cathode and  $\alpha$ -Fe<sub>2</sub>O<sub>3</sub> photoanode.

Current density as function of potential measured at  $\alpha$ -Fe<sub>2</sub>O<sub>3</sub> photoanode (with Pt counter electrode) during water oxidation in 0.5 M NaOH under 1-sun illumination (blue circle). Reference electrode: Ag/AgCl/KCl (sat'd).

The Pt counter electrode (12.6 cm<sup>2</sup>) is used to assure that the only limiting reaction is the photoelectrochemical water oxidation at  $\alpha$ -Fe<sub>2</sub>O<sub>3</sub> photoanode (2.8 cm<sup>2</sup>).

## 9. Comparison with other solar light-assisted systems

**Table S5** Comparison of FE, current density ( $j$ ),  $\eta_{\text{PAE}}$  and  $\eta_{\text{ECE}}$  with other solar light-assisted systems for CO<sub>2</sub> reduction, comprising different anode and cathode couples.

| System  | Anode                               | Cathode               | FE                                                 | $j / \text{mA cm}^{-2}$ | $\eta_{\text{PAE}}$               | $\eta_{\text{ECE}}$ | Ref.         |
|---------|-------------------------------------|-----------------------|----------------------------------------------------|-------------------------|-----------------------------------|---------------------|--------------|
| PEC     | GaAs/<br>InGaP/TiO <sub>2</sub> /Ni | Pd/C-Ti<br>mesh       | 94%<br>(HCOOH)                                     | 8.5                     | 10%                               | 59.3%               | 7            |
| PV + EC | IrO <sub>2</sub><br>Nanotubes       | Cu-Ag<br>Nanocoral    | 70%<br>(CO/hydrocarbons<br>/ oxygenates)           | 9                       | 4%                                | 34%                 | 8            |
| PV + EC | SnO <sub>2</sub> /CuO               | SnO <sub>2</sub> /CuO | 86.6% (CO)                                         | 11.6                    | 13.4%                             | 47%                 | 9            |
| PEC     | BiVO <sub>4</sub>                   | Cu                    | 65% (HCOOH)<br>at 0.75 V<br>80% (HCOH)<br>at 0.9 V | 0.10<br>0.36            | 0.3%<br>(HCOOH)<br>0.7%<br>(HCOH) | -                   | 10           |
| PV + EC | IrO <sub>x</sub>                    | Nanoporous<br>Ag      | 93% (CO)                                           | 6.0                     | 8.0%                              | 44.6%               | 11           |
| PEC     | TiO <sub>2</sub>                    | Sn-GDE                | 64%<br>(HCOOH)                                     | 2.9                     | 0.24%                             | 70%                 | 12           |
| PV + EC | IrO <sub>2</sub>                    | Au                    | 80% to 90% (CO)                                    | 5.8                     | 6.5%                              | 48.5%               | 13           |
| PEC     | BiVO <sub>4</sub> /CoPi             | PDA-<br>biocathode    | 99%<br>(HCOOH)                                     | 0.0001                  | 0.042%                            | -                   | 14           |
| PEC     | Fe <sub>2</sub> O <sub>3</sub>      | BDD                   | 62% (HCOOH)                                        | 0.28                    | 0.3%                              | 46%                 | This<br>work |

PEC: photoelectrochemical. PV: photovoltaic. EC: electrochemical. GDE: gas diffusion electrode. PDA: electrochemically synthesized polydopamine thin films.

## 10. References

- 1 Y. Ling, G. Wang, D. A. Wheeler, J. Z. Zhang and Y. Li, *Nano Lett*, 2011, **11**, 2119–2125.
- 2 J. Y. Kim, G. Magesh, D. H. Youn, J. W. Jang, J. Kubota, K. Domen and J. S. Lee, *Sci. Rep.*, 2013, **3**, 2681.
- 3 J. Y. Kim, D. H. Youn, J. H. Kim, H. G. Kim and J. S. Lee, *ACS Appl. Mater. Interfaces*, 2015, **7**, 14123–14129.
- 4 J. Y. Kim, D. H. Youn, K. Kang and J. S. Lee, *Angew. Chem., Int. Ed.*, 2016, **55**, 10854–10858.
- 5 F. Malara, A. Minguzzi, M. Marelli, S. Morandi, R. Psaro, V. Dal Santo and A. Naldoni, *ACS Catal.*, 2015, **5**, 5292–5300.
- 6 G. Iwai, A. Fiorani, J. Du and Y. Einaga, *Energy Adv.*, 2023, **2**, 733–738.
- 7 X. Zhou, R. Liu, K. Sun, Y. Chen, E. Verlage, S. A. Francis, N. S. Lewis and C. Xiang, *ACS Energy Lett.*, 2016, **1**, 764–770.
- 8 J. Gurudayal, D. Srankó, C. Towle, Y. Lum, M. Hettick, M. Scott, A. Javey and J. Ager, *Energy Environ. Sci.*, 2017, **10**, 2222–2230.
- 9 M. Schreier, F. Héroguel, L. Steier, S. Ahmad, J. Luterbacher, M. Mayer, J. Luo and M. Grätzel, *Nat. Energy*, 2017, **2**, 17087.
- 10 C. W. Kim, M. J. Kang, S. Ji and Y. S. Kang, *ACS Catal.*, 2018, **8**, 968–974.
- 11 S. Y. Chae, S. Y. Lee, S. G. Han, H. Kim, J. Ko, S. Park, O.-S. Joo, D. Kim, Y. Kang and U. Lee, *Sustainable Energy Fuels*, 2020, **4**, 199–212.
- 12 E. Irtem, M. D. Hernández-Alonso, A. Parra, C. Fàbrega, G. Penelas-Pérez, J. R. Morante and T. Andreu, *Electrochim. Acta*, 2017, **240**, 225–230.
- 13 M. Schreier, L. Curvat, F. Giordano, L. Steier, A. Abate, S. Zakeeruddin, J. Luo, M. Mayer and M. Grätzel, *Nat. Commun.*, 2015, **6**, 7326.
- 14 S. Y. Lee, S. Y. Lim, D. Seo, J.-Y. Lee and T. D. Chung, *Adv. Energy Mater.*, 2016, **6**, 1502207.
